# Supplementary material for: Feedback of patient-reported outcomes to healthcare professionals for comparing health service performance: a scoping review
Source: HighWire-hosted journal article supplement (doi:10.1136/bmjopen-2020-038190), 2020-11-01
Supplement: bmjopen-2020-038190supp001_data_supplement.pdf [file bmjopen-2020-038190supp001_data_supplement.pdf]

**Appendix 1.** Data extraction tool used for academic literature

|                                                                                                                                       | Description |
|---------------------------------------------------------------------------------------------------------------------------------------|-------------|
| <b>Author</b>                                                                                                                         |             |
| <b>Year</b>                                                                                                                           |             |
| <b>Title</b>                                                                                                                          |             |
| <b>Country</b>                                                                                                                        |             |
| <b>Type of Article</b>                                                                                                                |             |
| <b>Characteristics of patient</b>                                                                                                     |             |
| <b>Characteristic of professional</b>                                                                                                 |             |
| <b>Clinical area of practice</b>                                                                                                      |             |
| <b>Characteristic of study</b>                                                                                                        |             |
| <b>Number of participants (included, excluded, partially followed up and lost)</b>                                                    |             |
| <b>Unit of analysis</b>                                                                                                               |             |
| <b>Level of feedback (individual [micro]/group-level [meso]/population level [macro])</b>                                             |             |
| <b>Feedback for patient/clinician</b>                                                                                                 |             |
| <b>Type of PRO(M) used</b>                                                                                                            |             |
| <b>Purpose of feedback (influence patient relations, change clinical practice etc)</b>                                                |             |
| <b>Findings related to existing evidence on best practice in the readability and feedback of PRO data to healthcare professionals</b> |             |
| <b>Findings related to what PRO data presentation formats were used</b>                                                               |             |
| <b>Findings related to factors that influence PRO data interpretation or use in clinical practice</b>                                 |             |
| <b>Additional notes</b>                                                                                                               |             |
