# Supplementary material for: Feedback of patient-reported outcomes to healthcare professionals for comparing health service performance: a scoping review
Source: HighWire-hosted journal article supplement (doi:10.1136/bmjopen-2020-038190), 2020-11-01
Supplement: bmjopen-2020-038190supp002_data_supplement.pdf [file bmjopen-2020-038190supp002_data_supplement.pdf]

**Appendix 2.** Data extraction tool used for the grey literature

|                                                                               | Description |
|-------------------------------------------------------------------------------|-------------|
| Author/Organization                                                           |             |
| Year of publication                                                           |             |
| Title                                                                         |             |
| Country                                                                       |             |
| Type of document                                                              |             |
| Date of access                                                                |             |
| URL                                                                           |             |
| Background Patient Reported Outcome Measures information                      |             |
| Patient Reported Outcomes data display features                               |             |
| Patient Reported Outcomes data feedback mechanism(s)                          |             |
| Identified barriers to Patient Reported Outcomes data uptake among clinicians |             |
| Identified enablers to Patient Reported Outcomes data uptake among clinicians |             |
| Patient Reported Outcomes data issues (e.g. statistical/analytical methods)   |             |
| Additional notes                                                              |             |
