# Supplementary material for: Feedback of patient-reported outcomes to healthcare professionals for comparing health service performance: a scoping review
Source: HighWire-hosted journal article supplement (doi:10.1136/bmjopen-2020-038190), 2020-11-01
Supplement: bmjopen-2020-038190supp003_data_supplement.pdf [file bmjopen-2020-038190supp003_data_supplement.pdf]

**Supplemental Table 1.** Breakdown of academic literature search strategy and key words.

| <b>Datab<br/>ase</b> | <b>Search string</b>                                                                                                                                                                                                                                                                                                                                                                                                                                                                                                                                                                                                                                               | <b>Resu<br/>lts</b> |
|----------------------|--------------------------------------------------------------------------------------------------------------------------------------------------------------------------------------------------------------------------------------------------------------------------------------------------------------------------------------------------------------------------------------------------------------------------------------------------------------------------------------------------------------------------------------------------------------------------------------------------------------------------------------------------------------------|---------------------|
| Embas<br>e           | Patient-reported outcome measures<br>Patient reported outcomes<br>PROMs<br>PROM<br>PROs<br>PRO<br>1 or 2 or 3 or 4 or 5 or 6 – 213251 results<br>Patient-centered care<br>Patient centred care<br>Health care policy<br>Value based health care<br>Low value care<br>Quality of care<br>Health care quality<br>Quality improvement<br>8 or 9 or 10 or 11 or 12 or 13 or 14 or 15– 112842 results<br>Feedback<br>Audit<br>Review<br>Benchmark<br>Practice data<br>Hospital* data<br>Dashboard<br>Dash board<br>Public* report*<br>17 or 18 or 19 or 20 or 21 or 22 or 23 or 24 or 25 –<br>7 and 16 and 26 -<br>Limit 27 to (English languahe and yr="2009-Current") | 905                 |
| Ovid<br>Medlin<br>e  | 1. Patient-reported outcome measures<br>2. Patient reported outcomes<br>3. PROMs<br>4. PROM<br>5. PROs<br>6. PRO<br>7. 1 or 2 or 3 or 4 or 5 or 6 – 213251 results<br>8. Patient-centered care<br>9. Patient centred care<br>10. Health care policy<br>11. Value based health care<br>12. Low value care<br>13. Quality of care<br>14. Health care quality<br>15. Quality improvement<br>16. 8 or 9 or 10 or 11 or 12 or 13 or 14 or 15– 112842 results<br>17. Feedback<br>18. Audit                                                                                                                                                                               | 390                 |

|                |                                                                                                                                                                                                                                                                                                                                                                                                                                                                                                                                                                                                                                                                                                                                                                                                                                                                                                                                                                                                                                                                                                         |      |
|----------------|---------------------------------------------------------------------------------------------------------------------------------------------------------------------------------------------------------------------------------------------------------------------------------------------------------------------------------------------------------------------------------------------------------------------------------------------------------------------------------------------------------------------------------------------------------------------------------------------------------------------------------------------------------------------------------------------------------------------------------------------------------------------------------------------------------------------------------------------------------------------------------------------------------------------------------------------------------------------------------------------------------------------------------------------------------------------------------------------------------|------|
|                | 19. Review<br>20. Benchmark<br>21. Practice data<br>22. Hospital* data<br>23. Dashboard<br>24. Dash board<br>25. Public* report*<br>26. 17 or 18 or 19 or 20 or 21 or 22 or 23 or 24 or 25 –<br>27. 7 and 16 and 26 –<br>Limit 27 to (English language and yr="2009-Current")                                                                                                                                                                                                                                                                                                                                                                                                                                                                                                                                                                                                                                                                                                                                                                                                                           |      |
| Scopus         | TITLE-ABS-KEY ( "Patient reported outcome measures" OR "patient reported outcomes" OR "PROMs" OR "PROM" OR "PROs" OR "PRO" ) AND ( "patient centered care" OR "patient centred care" OR "health care policy" OR "value based health care" OR "low value care" OR "quality of care" OR "health care quality" OR "quality improvement" ) AND ( "feedback" OR "audit" OR "review" OR "benchmark" OR "practice data" OR "hospital* data" OR "dashboard" OR "dash board" OR "public* report" ) AND ( LIMIT-TO ( DOCTYPE , "ar" ) OR LIMIT-TO ( DOCTYPE , "re" ) OR LIMIT-TO ( DOCTYPE , "ed" ) OR LIMIT-TO ( DOCTYPE , "cp" ) ) AND ( LIMIT-TO ( SUBJAREA , "MEDI" ) OR LIMIT-TO ( SUBJAREA , "HEAL" ) ) AND ( LIMIT-TO ( PUBYEAR , 2019 ) OR LIMIT-TO ( PUBYEAR , 2018 ) OR LIMIT-TO ( PUBYEAR , 2017 ) OR LIMIT-TO ( PUBYEAR , 2016 ) OR LIMIT-TO ( PUBYEAR , 2015 ) OR LIMIT-TO ( PUBYEAR , 2014 ) OR LIMIT-TO ( PUBYEAR , 2013 ) OR LIMIT-TO ( PUBYEAR , 2012 ) OR LIMIT-TO ( PUBYEAR , 2011 ) OR LIMIT-TO ( PUBYEAR , 2010 ) OR LIMIT-TO ( PUBYEAR , 2009 ) ) AND ( LIMIT-TO ( LANGUAGE , "English" ) ) | 2896 |
| Web of science | TOPIC: (("patient reported outcome measures" OR "patient reported outcomes" OR "PROMs" OR "PROM" OR "PROs" OR "PRO") AND ("patient centered care" OR "patient centred care" OR "health care policy" OR "value based health care" OR "low value care" OR "quality of care" OR "health care quality" OR "quality improvement") AND ("feedback" OR "audit" OR "review" OR "benchmark" OR "practice data" OR "hospital* data" OR "dashboard" OR "dash board" OR "public* report*))<br>Timespan: 2009-2019                                                                                                                                                                                                                                                                                                                                                                                                                                                                                                                                                                                                   | 220  |
